# Supplementary material for: Membrane Mediated Antimicrobial and Antitumor Activity of Cathelicidin 6: Structural Insights from Molecular Dynamics Simulation on Multi-Microsecond Scale
Source: PubMed Central journal article supplement (PMC4938549; doi:10.1371/journal.pone.0158702), 2016-07-08

### BMAP27 in POPC membrane system

**A**

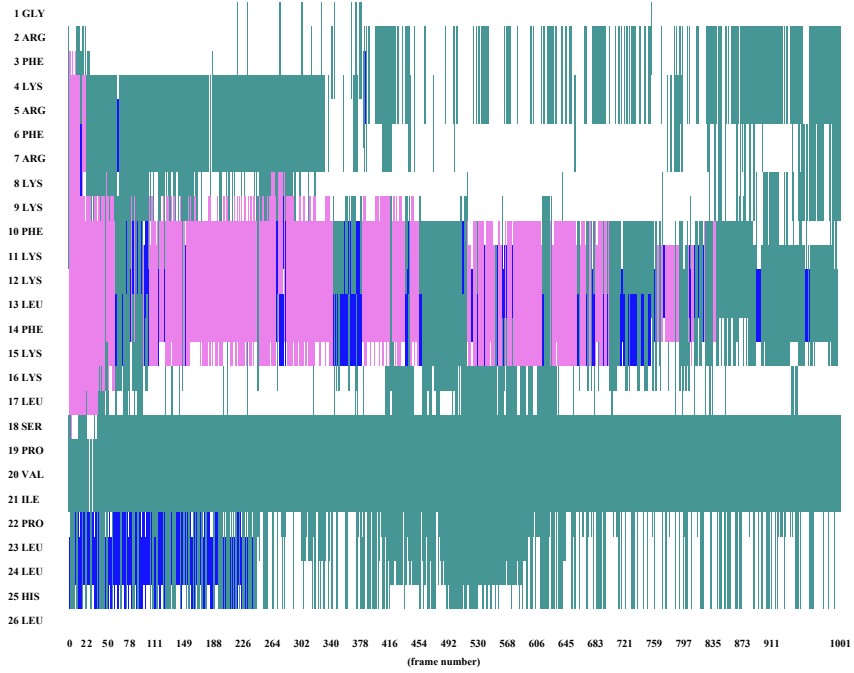

Secondary structure units

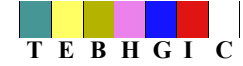

### BMAP27 in DOPG membrane system

**B**

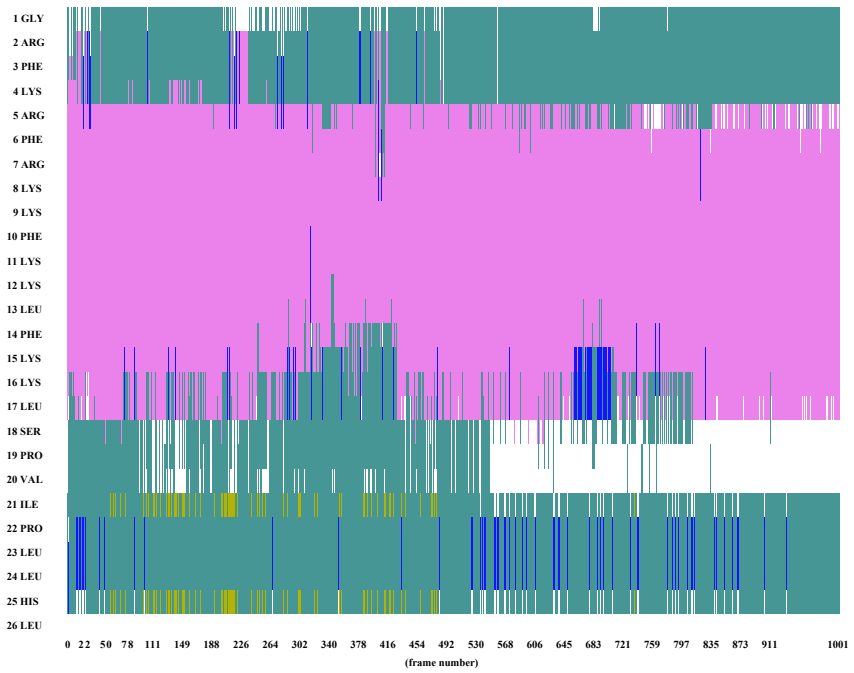

Supplement: pone.0158702.s001.pdf [file pone.0158702.s001.pdf]
