# Supplementary material for: Membrane Mediated Antimicrobial and Antitumor Activity of Cathelicidin 6: Structural Insights from Molecular Dynamics Simulation on Multi-Microsecond Scale
Source: PubMed Central journal article supplement (PMC4938549; doi:10.1371/journal.pone.0158702), 2016-07-08

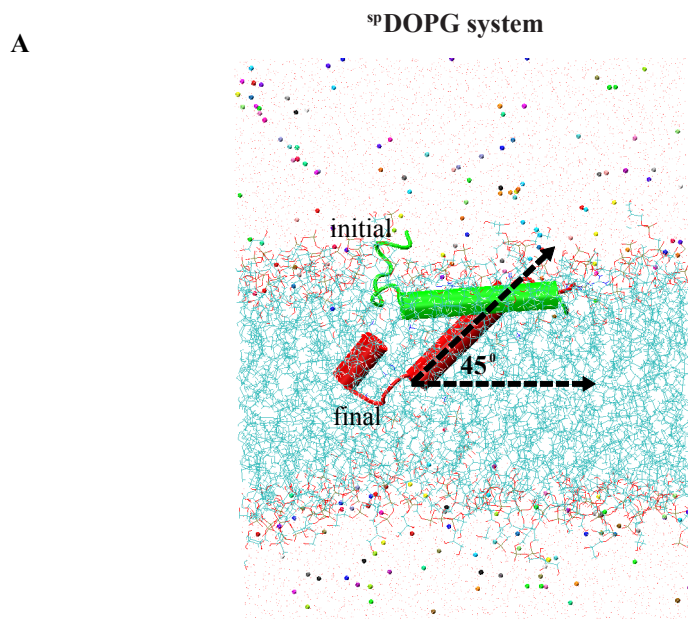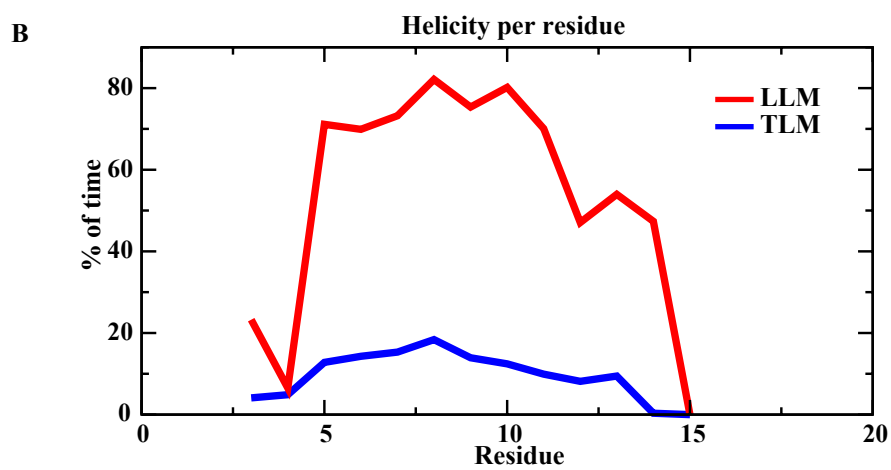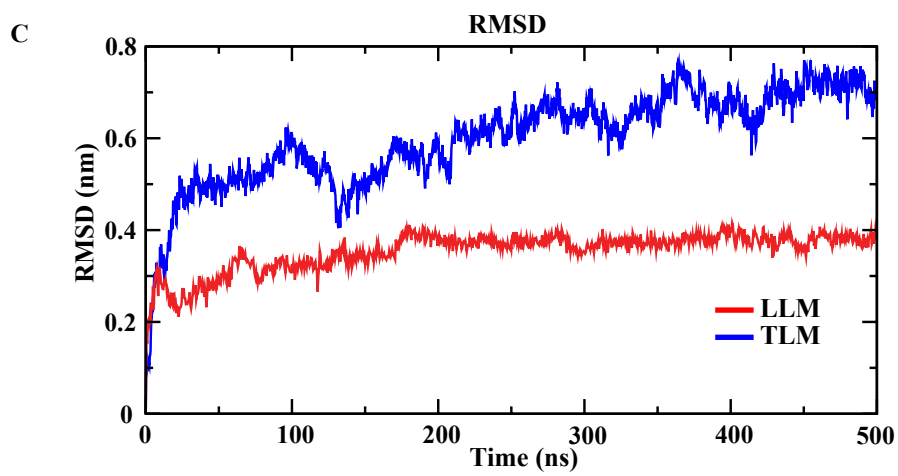

Supplement: pone.0158702.s002.pdf [file pone.0158702.s002.pdf]
