# Supplementary material for: Membrane Mediated Antimicrobial and Antitumor Activity of Cathelicidin 6: Structural Insights from Molecular Dynamics Simulation on Multi-Microsecond Scale
Source: PubMed Central journal article supplement (PMC4938549; doi:10.1371/journal.pone.0158702), 2016-07-08
Supplement: pone.0158702.s004.pdf [file pone.0158702.s004.pdf]

**BMAP27<sub>mut</sub> interaction with TLM system**

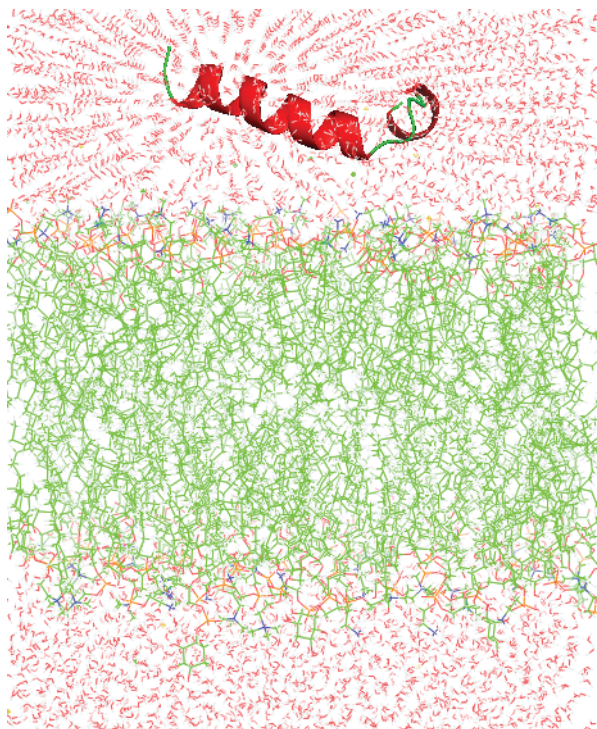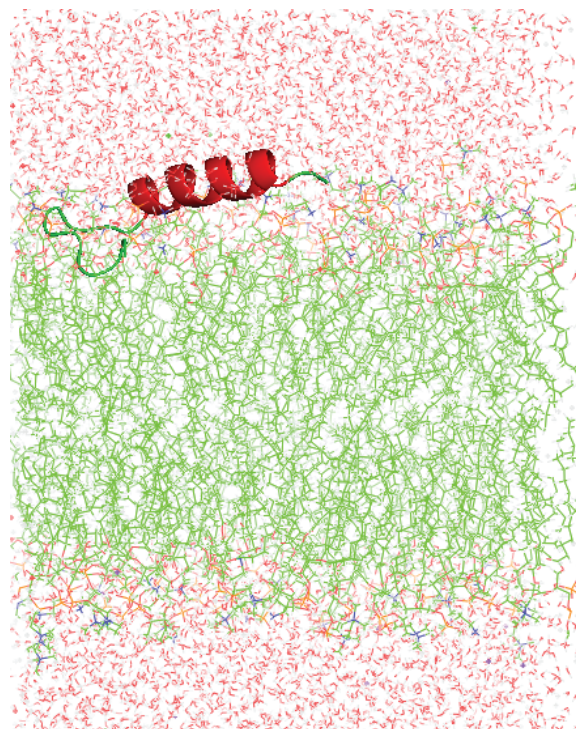

**BMAP27<sub>mut</sub> interaction with DOPG system**

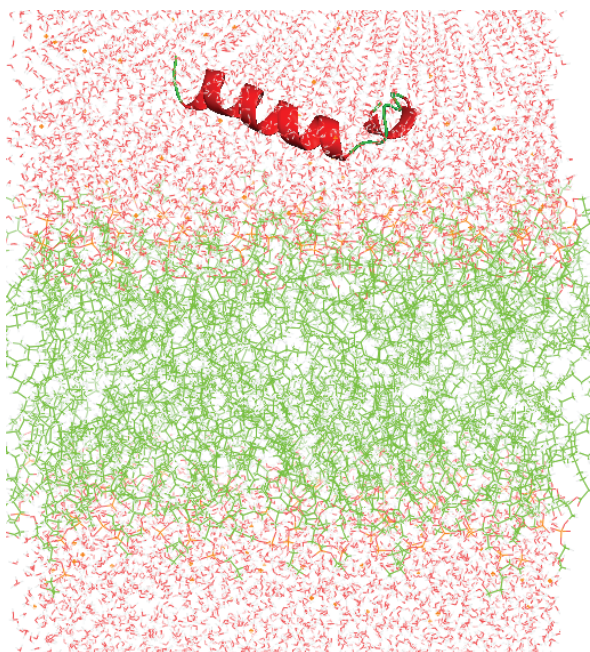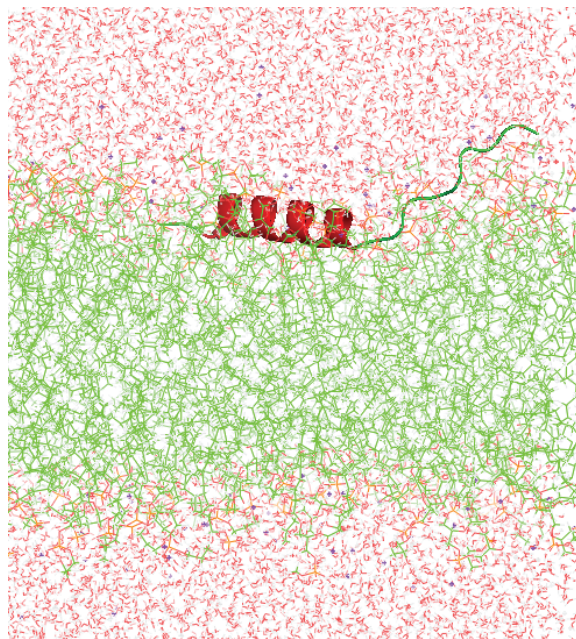

**Initial MD snapshot**

**Final MD snapshot**
