# Supplementary material for: Membrane Mediated Antimicrobial and Antitumor Activity of Cathelicidin 6: Structural Insights from Molecular Dynamics Simulation on Multi-Microsecond Scale
Source: PubMed Central journal article supplement (PMC4938549; doi:10.1371/journal.pone.0158702), 2016-07-08

Thymocytes-like membrane (TLM)

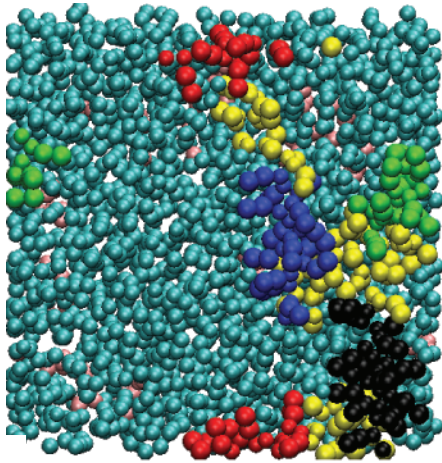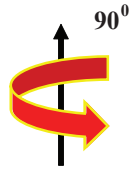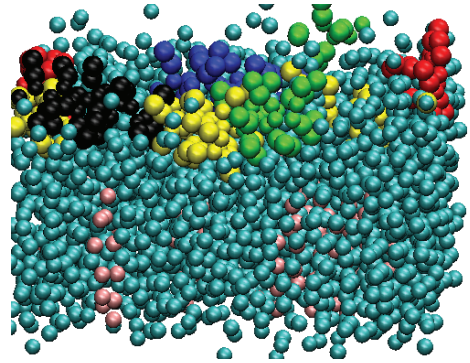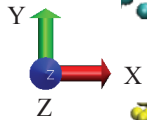

Hypothetical proliferative-like membrane (hyPLM)

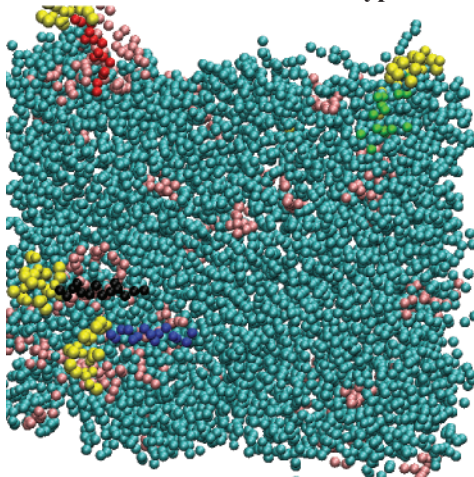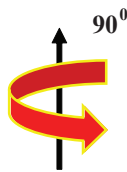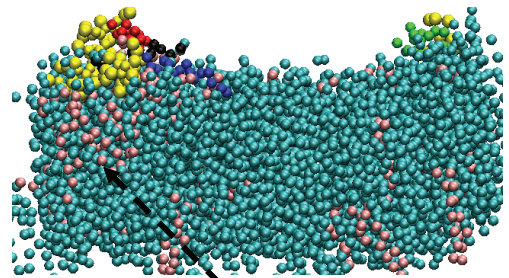

Selective DOPS aggregation

Leukemia-like membrane (LLM)

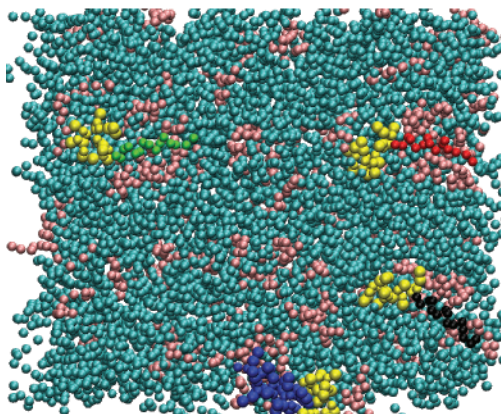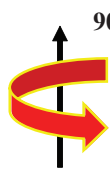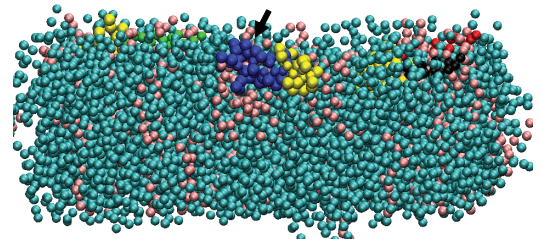

Supplement: pone.0158702.s006.pdf [file pone.0158702.s006.pdf]
